# Supplementary material for: Modulating heterointerfaces of tungsten incorporated CoSe/Co3O4as a highly efficient electrocatalyst for overall water splitting
Source: Royal Society of Chemistry journal article supplement (doi:10.1039/d1ta09932a), 2022-01-01
Supplement: d1ta09932a1.pdf [file d1ta09932a1.pdf]

## Supporting Information

# **Modulating heterointerfaces of tungsten incorporated CoSe/Co<sub>3</sub>O<sub>4</sub> as highly efficient electrocatalyst for overall water splitting**

Ravichandran Balaji<sup>a</sup>, Thanh Tuan Nguyen<sup>a</sup>, Kempanna Harish<sup>a</sup>, Nam Hoon Kim<sup>a\*</sup>, Joong Hee

Lee<sup>a,b\*</sup>

<sup>a</sup>Advanced Materials Institute of Nano Convergence Engineering (BK21 FOUR), Dept. of Nano Convergence Engineering, Jeonbuk National University, Jeonju, Jeonbuk 54896, Republic of Korea.

<sup>b</sup>Carbon Composite Research Centre, Department of Polymer – Nano Science and Technology, Jeonbuk National University, Jeonju, Jeonbuk 54896, Republic of Korea.

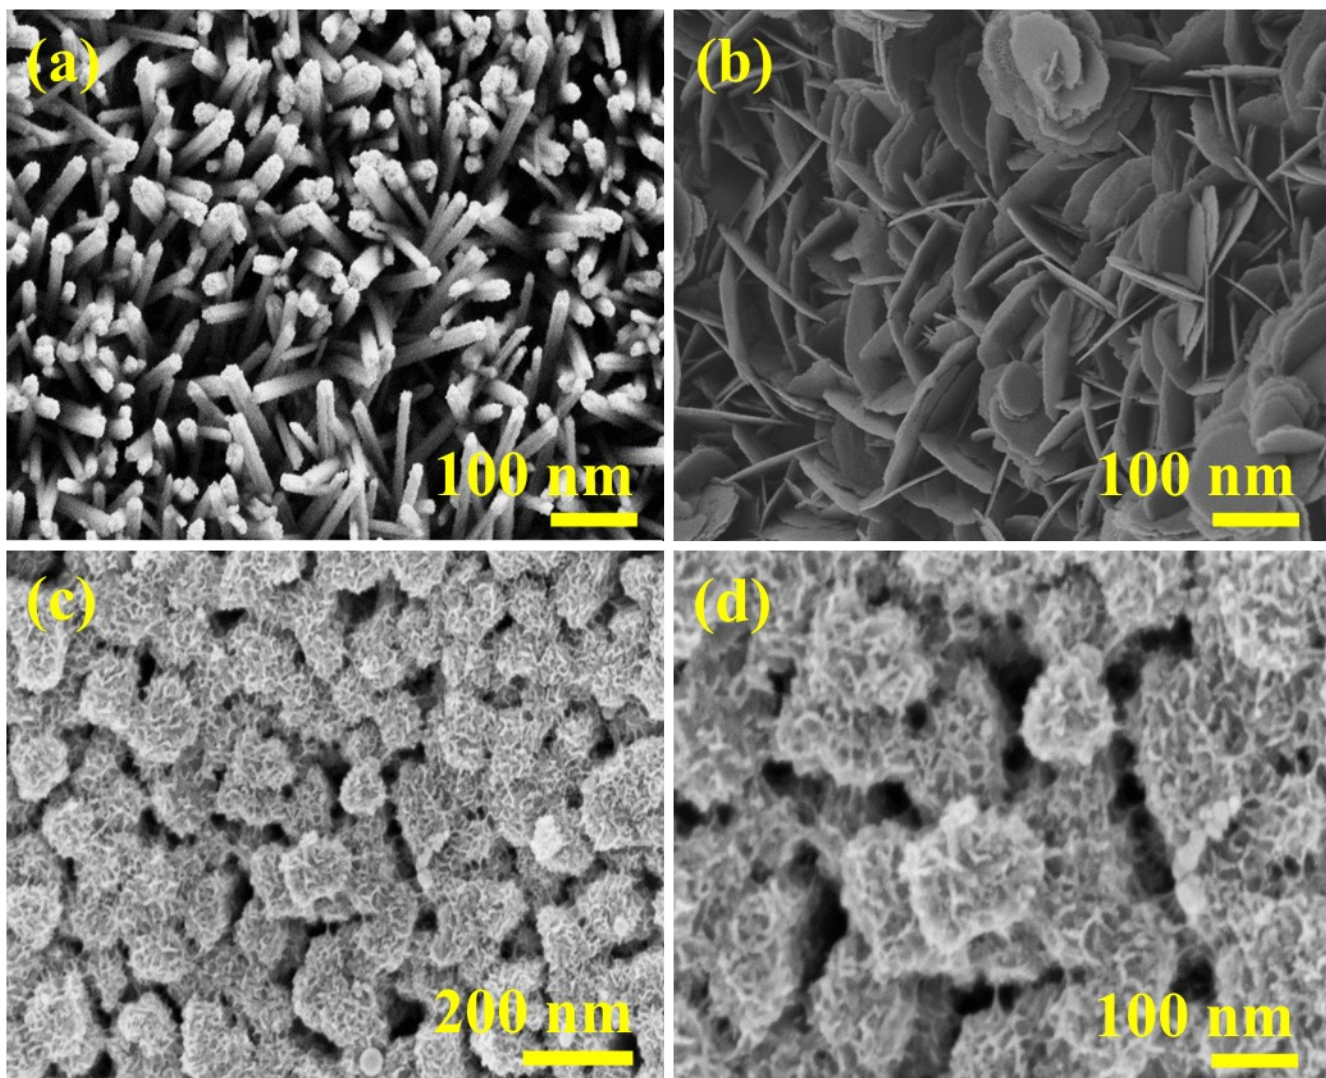

**Fig. S1.** SEM images (a) Pure Co LDH (b) Pure W LDH (c) Low and (d) high magnification of as-synthesized WCo LDH nanostructure.

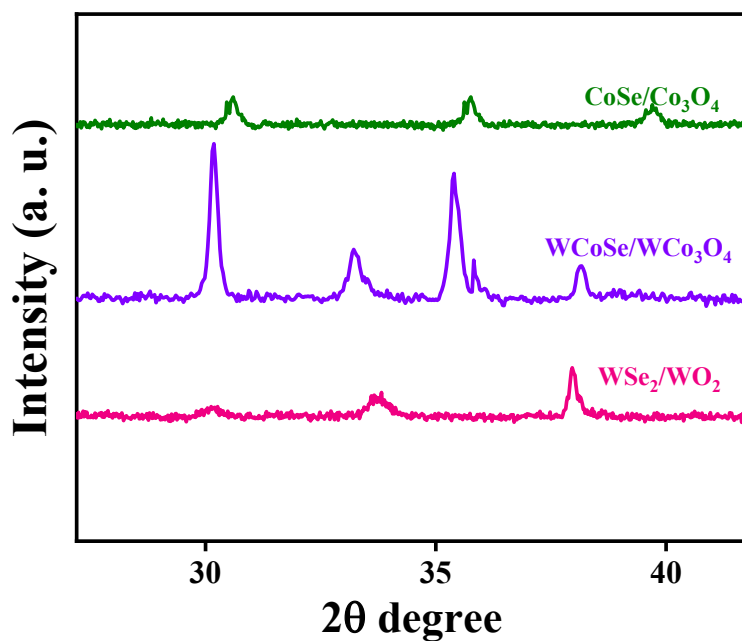

Fig. S2. XRD pattern zoomed version of WCoSe/WCo<sub>3</sub>O<sub>4</sub> heterostructure.

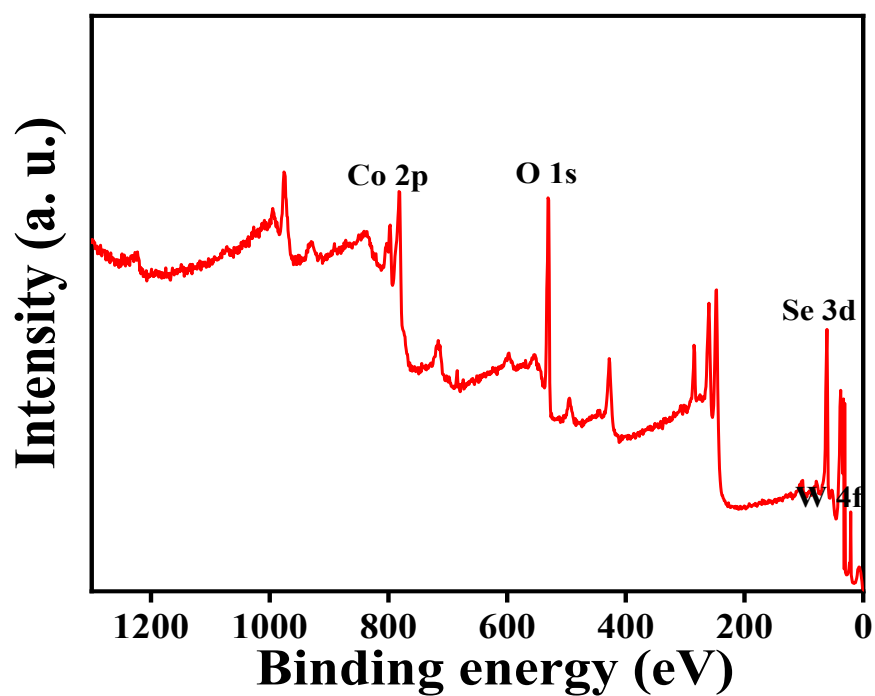

Fig. S3. XPS full spectra indicates that the elements presence of W, Co, O, and Se in the WCoSe/WCo<sub>3</sub>O<sub>4</sub> heterostructure.

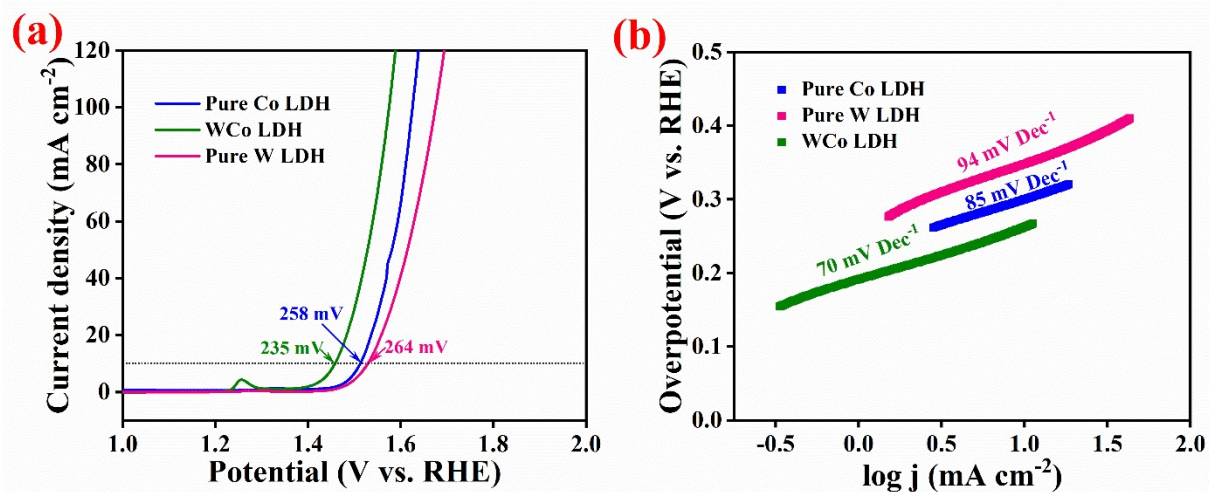

Fig. S4. (a) LSV performance and (b) Tafel slopes of precursors for OER.

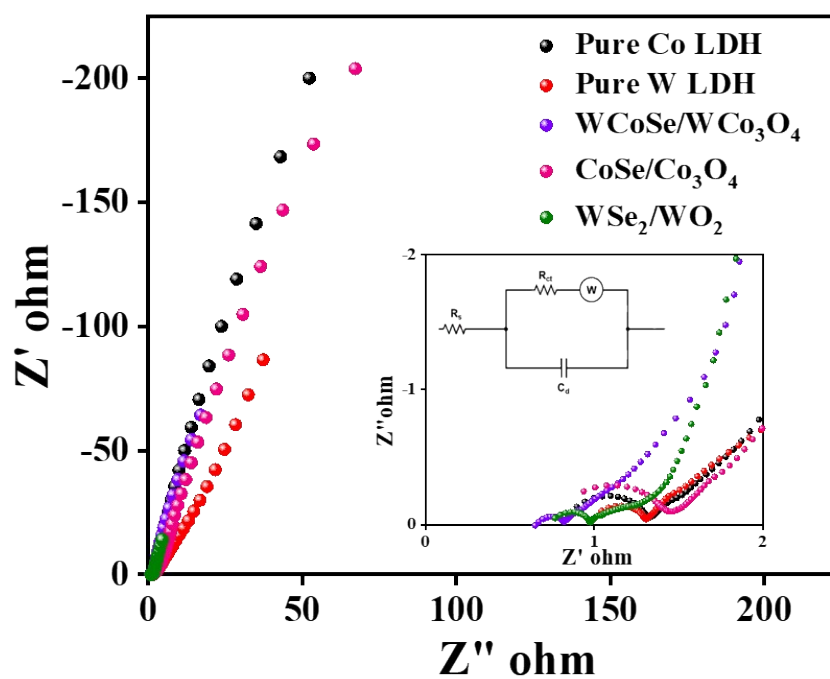

Fig. S5. EIS of as prepared electrocatalysts for OER activities.

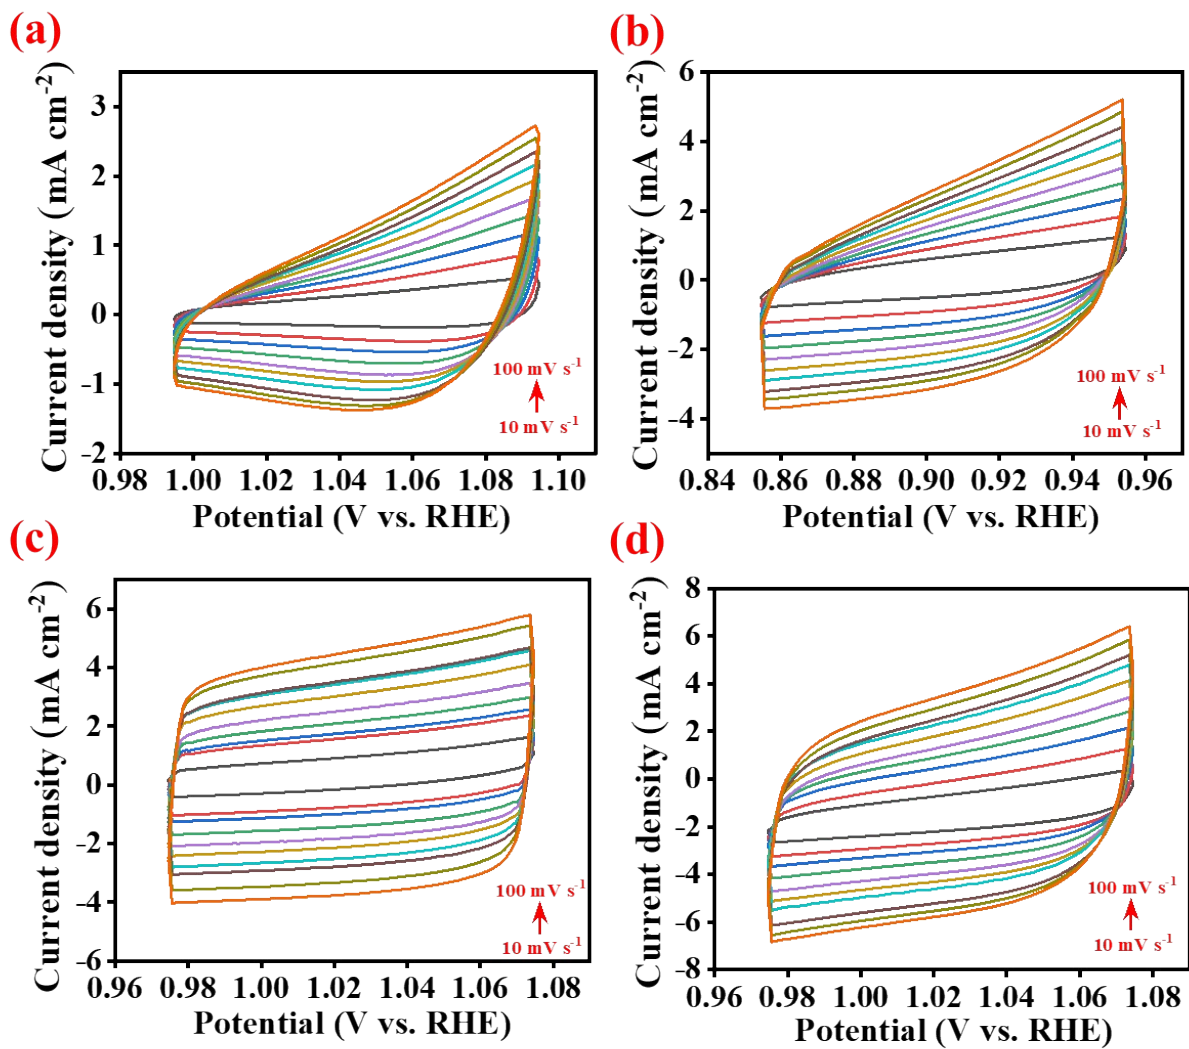

**Fig. S6.** CV curves of OER catalysts with varying scan rates from 10 to 100 mV s<sup>-1</sup> (a) WSe<sub>2</sub>/WO<sub>2</sub>, (b) CoSe/Co<sub>3</sub>O<sub>4</sub> (c) RuO<sub>2</sub> and (d) WCoSe/WCo<sub>3</sub>O<sub>4</sub> HS electrocatalysts.

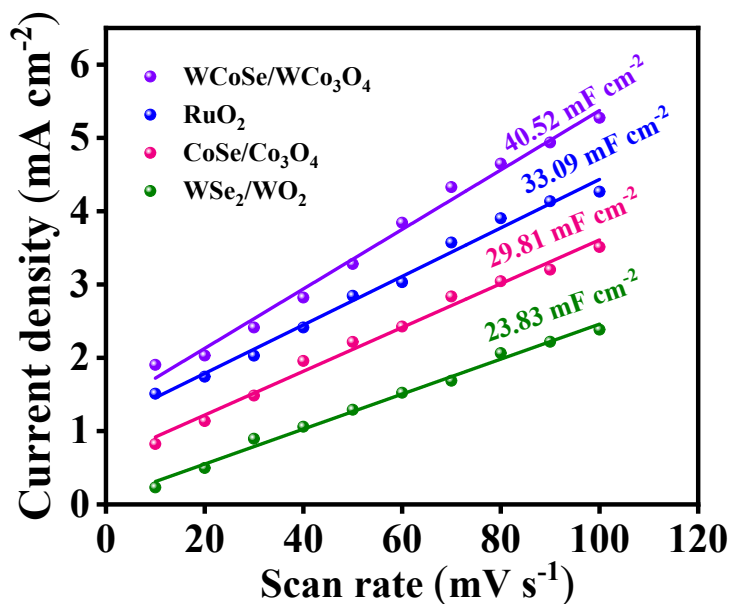

**Fig. S7.** ECSA for WCoSe/WCo<sub>3</sub>O<sub>4</sub> HS and other comparative electrocatalysts during OER process.

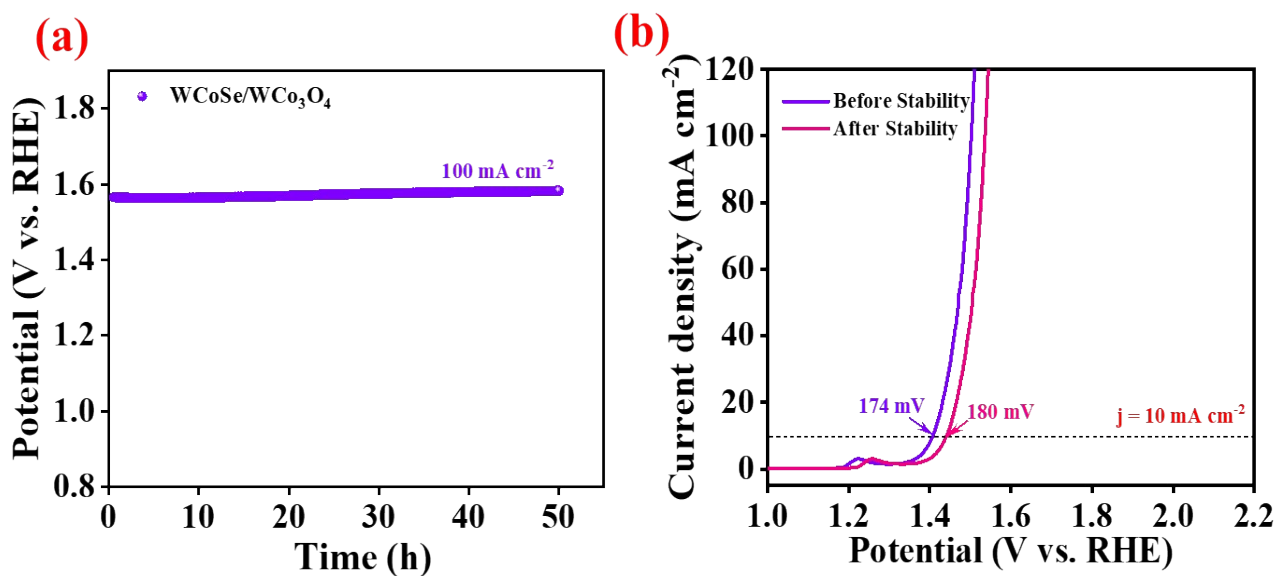

**Fig. S8.** (a) Long term stability of WCoSe/WCo<sub>3</sub>O<sub>4</sub> HS electrocatalyst at current density of 100 mA cm<sup>-2</sup> for 50 h towards OER activities and (b) LSV curves of WCoSe/WCo<sub>3</sub>O<sub>4</sub> HS electrocatalyst after long term stability.

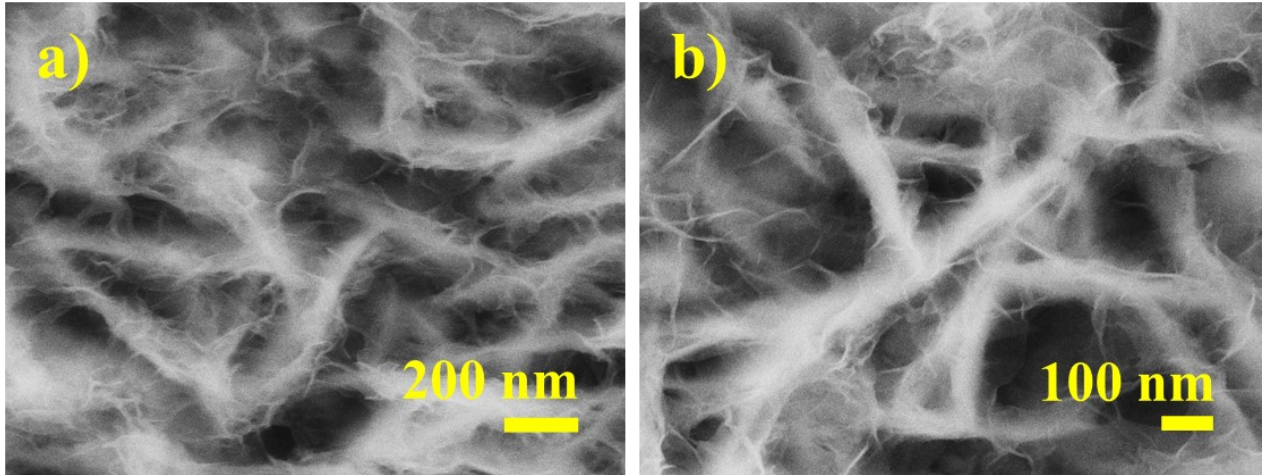

**Fig. S9.** a) Low and b) high magnification SEM of WCoSe/WCo<sub>3</sub>O<sub>4</sub> after OER stability performance.

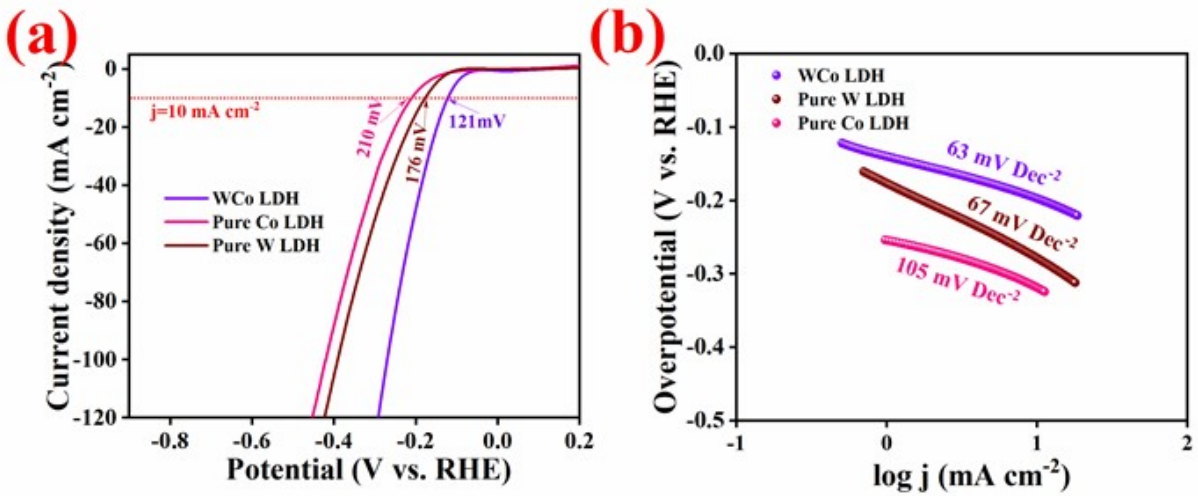

**Fig. S10.** (a) LSV performance and (b) Tafel slopes of precursors for HER.

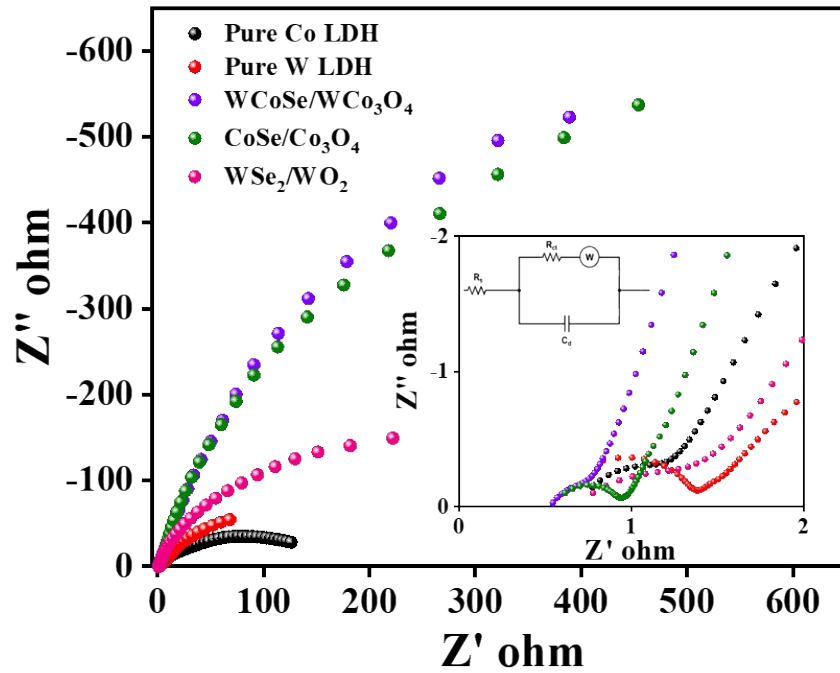

**Fig. S11.** EIS of as-prepared electrocatalysts for HER performance.



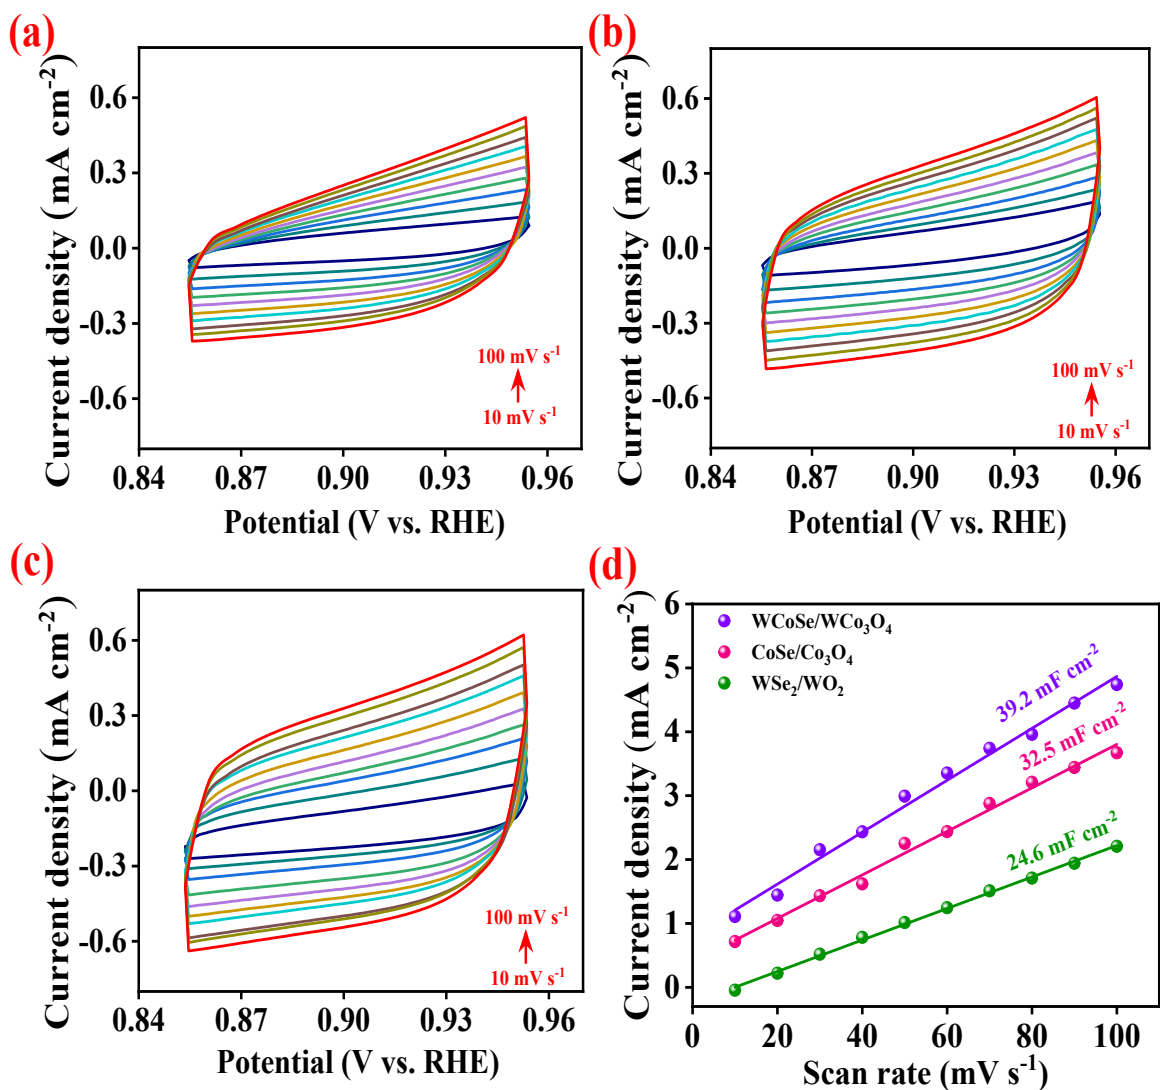

**Fig. S12.** CV curves of HER catalysts with varying scan rates from 10 to 100 mV s<sup>-1</sup> (a) WSe<sub>2</sub>/WO<sub>2</sub>, (b) CoSe/Co<sub>3</sub>O<sub>4</sub> and (c) WCoSe/WCo<sub>3</sub>O<sub>4</sub> heterostructure electrocatalysts. (f) ECSA for WCoSe/WCo<sub>3</sub>O<sub>4</sub> heterostructure and other comparative electrocatalysts during HER process.

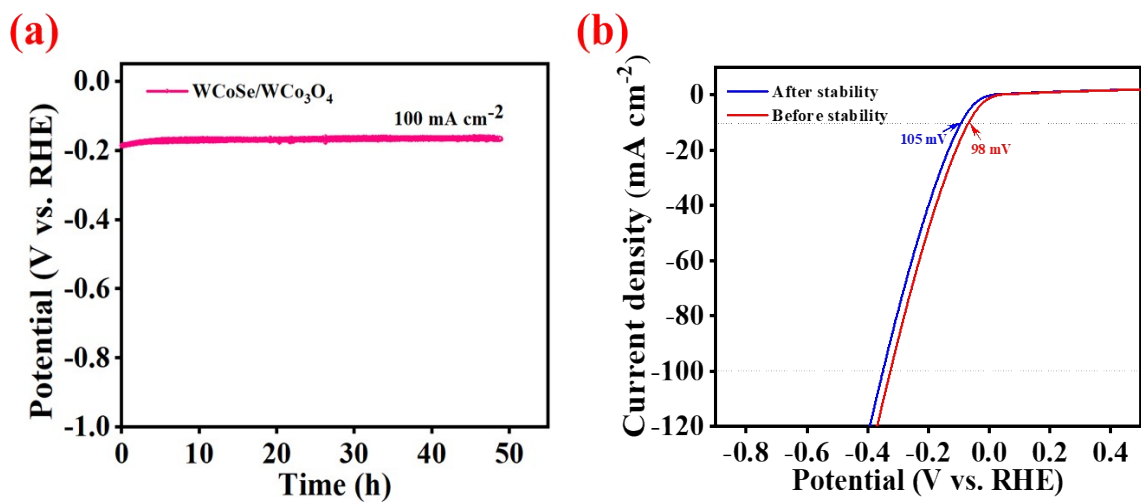

**Fig. S13.** The HER stability performance: a) chronopotentiometric response after 50 h and b) LSV curves of OER performance after long term stability of 50 h for WCoSe/WCo<sub>3</sub>O<sub>4</sub> HS electrocatalyst.

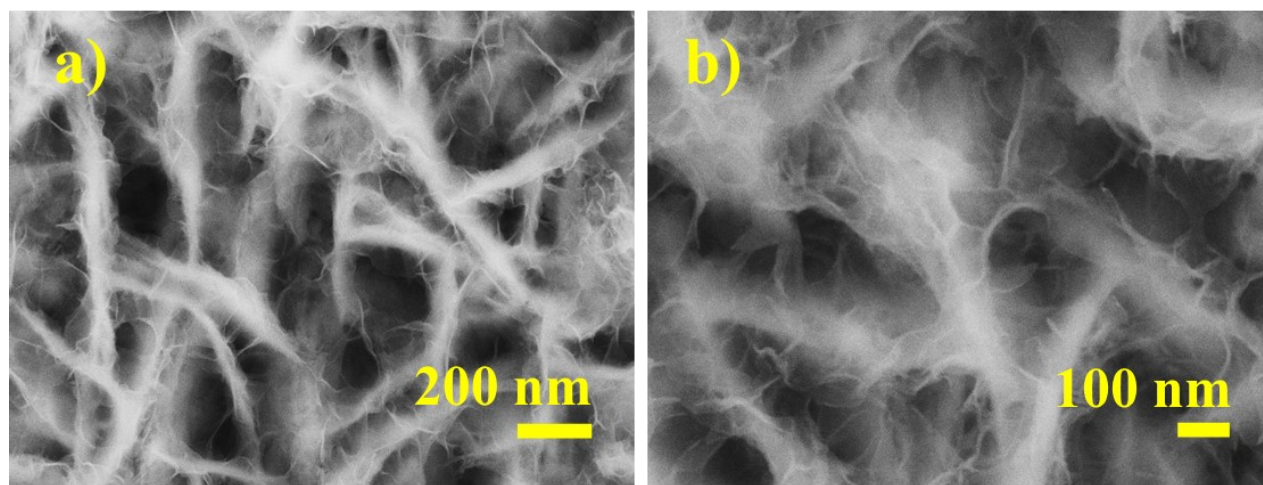

**Fig. S14.** a) Low and b) high magnification SEM of WCoSe/WCo<sub>3</sub>O<sub>4</sub> heterostructure after HER performance.

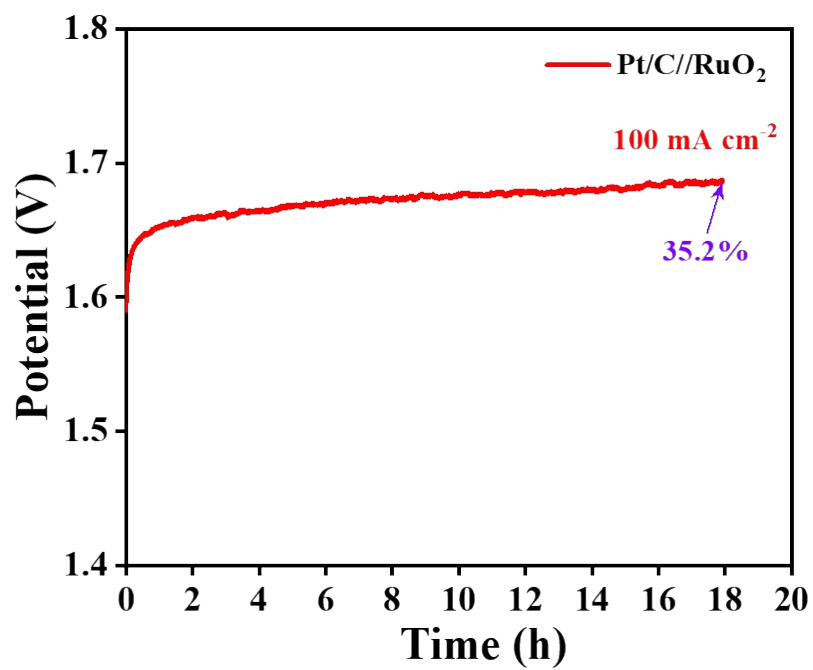

Fig. S15. Long term stability of Pt/C||RuO<sub>2</sub> device.

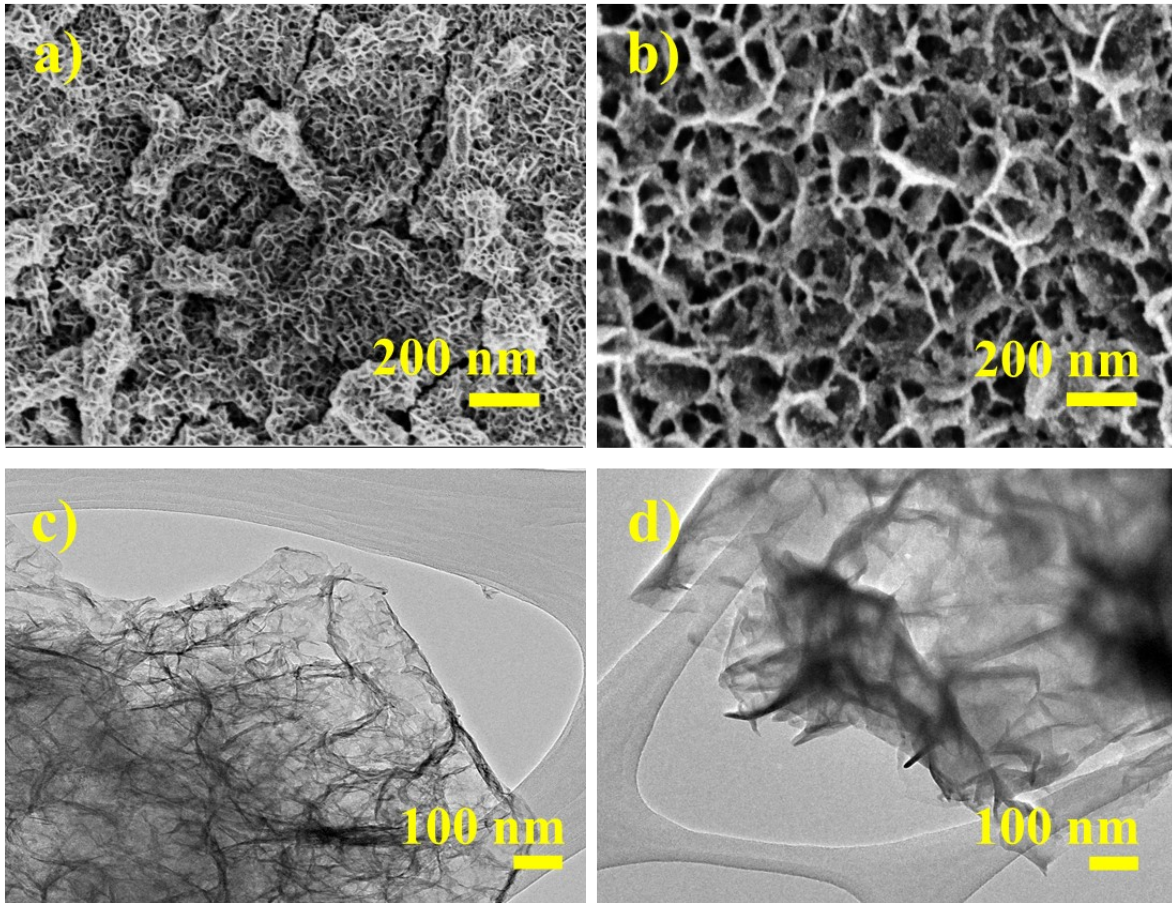

**Fig. S16.** SEM and TEM after overall water splitting of  $\text{WCoSe}/\text{WCo}_3\text{O}_4 \parallel \text{WCoSe}/\text{WCo}_3\text{O}_4$  bifunctional device.

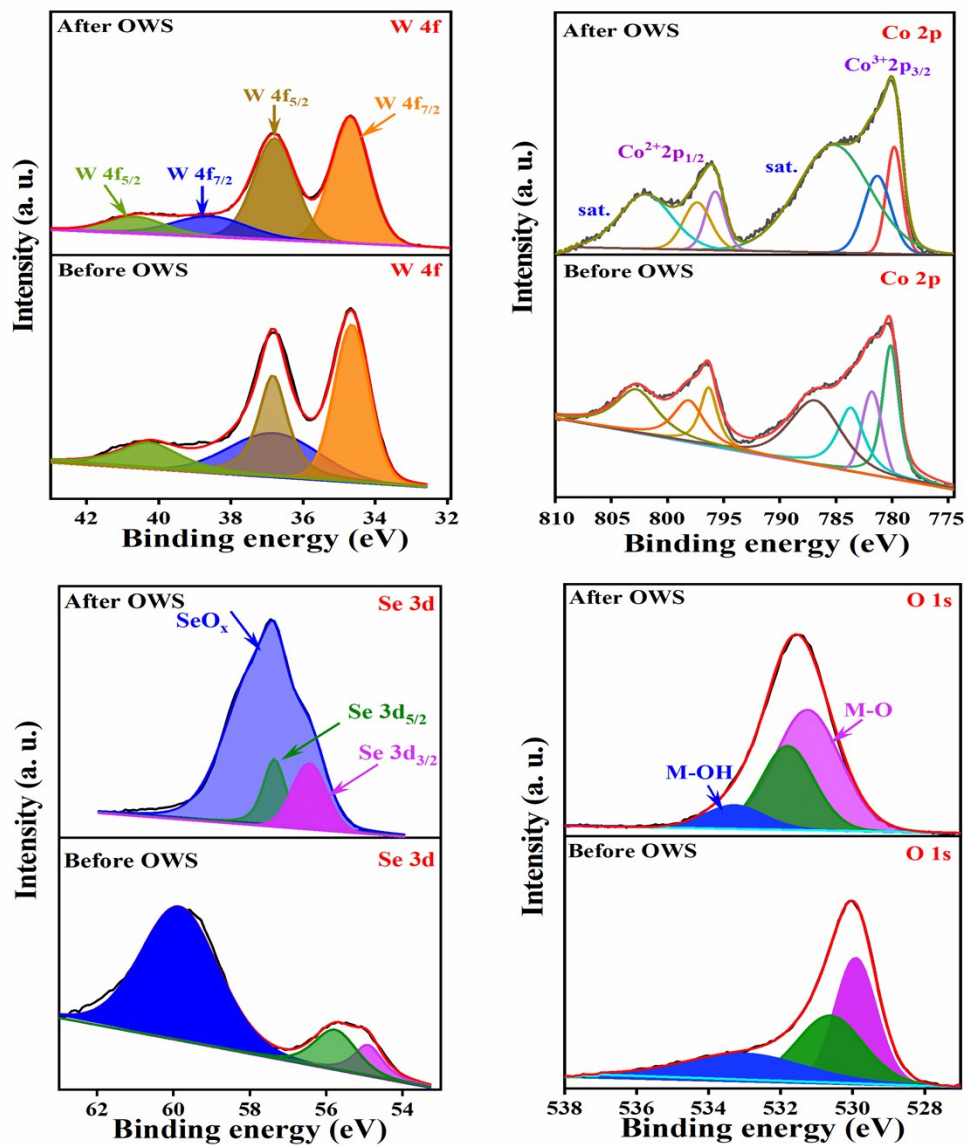

Fig. S17. XPS after overall water splitting device.

**Table S1.** Comparison of OER performance with previous reported state-of-the-art OER catalysts.

| OER catalysts                                           | Electrolytes | Current density (J)    | Overpotential (mV) | Tafel (mV dec <sup>-1</sup> ) | References |
|---------------------------------------------------------|--------------|------------------------|--------------------|-------------------------------|------------|
| WCoSe/WCo <sub>3</sub> O <sub>4</sub>                   | 1.0 M KOH    | 10 mA cm <sup>-2</sup> | 175                | 62                            | This work  |
| Mn (Fe <sub>0.3</sub> Ni <sub>0.7</sub> )O <sub>x</sub> | 1.0 M KOH    | 10 mA cm <sup>-2</sup> | 262                | -                             | 1          |
| FeNi <sub>3</sub> @NC                                   | 1.0 M KOH    | 10 mA cm <sup>-2</sup> | 277                | 77                            | 2          |
| meso-NPC/Co <sub>2</sub> NiO <sub>x</sub>               | 1.0 M KOH    | 10 mA cm <sup>-2</sup> | 330                | 54                            | 3          |
| FeNi <sub>2</sub> S <sub>4</sub> NPs/CB                 | 1.0 M KOH    | 10 mA cm <sup>-2</sup> | 405                | 126                           | 4          |
| Co <sub>2</sub> P/CoNPC                                 | 1.0 M KOH    | 10 mA cm <sup>-2</sup> | 326                | 72.6                          | 5          |
| Re/ReS <sub>2</sub> -7H/CC                              | 1.0 M KOH    | 10 mA cm <sup>-2</sup> | 290                | -                             | 6          |
| CoP-B1                                                  | 1.0 M KOH    | 10 mA cm <sup>-2</sup> | 297                | 58.1                          | 7          |
| Fe <sub>3</sub> O <sub>4</sub> /CoO CNTs                | 1.0 M KOH    | 10 mA cm <sup>-2</sup> | 270                | 59                            | 8          |
| Ni <sub>10</sub> -CoPi                                  | 1.0 M KOH    | 10 mA cm <sup>-2</sup> | 320                | 44.5                          | 9          |
| W <sub>2</sub> N/WC                                     | 1.0 M KOH    | 10 mA cm <sup>-2</sup> | 320                | 122.8                         | 10         |

**Table S2.** Comparison of HER performance with previous reported state-of-the-art HER catalysts.

| HER catalysts                            | Electrolytes | Current density (J)     | Overpotential (mV) | Tafel (mV dec <sup>-1</sup> ) | References |
|------------------------------------------|--------------|-------------------------|--------------------|-------------------------------|------------|
| WCoSe/WCo <sub>3</sub> O <sub>4</sub>    | 1.0 M KOH    | 10 mA cm <sup>-2</sup>  | 98                 | 72                            | This work  |
| CFeNiP                                   | 1.0 M NaOH   | 10 mA cm <sup>-2</sup>  | 132                | 58                            | 11         |
| NiRu-LDH                                 | 1.0 M KOH    | 10 mA cm <sup>-2</sup>  | 165                | 107                           | 12         |
| CoMoO <sub>4</sub> ·nH <sub>2</sub> O/CF | 1.0 M KOH    | 10 mA cm <sup>-2</sup>  | -                  | 134                           | 13         |
| Te/FeNiOOH-NCs                           | 1.0 M KOH    | 10 mA cm <sup>-2</sup>  | 167                | 93                            | 14         |
| Ni/Mo <sub>6</sub> Ni <sub>6</sub> C@C   | 1.0 M KOH    | 10 mA cm <sup>-2</sup>  | 101                | 88                            | 15         |
| MoS <sub>2</sub> /MoN-8                  | 1.0 M KOH    | 10 mA cm <sup>-2</sup>  | 132                | 98                            | 16         |
| Mo <sub>2</sub> N/NF                     | 1.0 M KOH    | 10 mA cm <sup>-2</sup>  | 109.7              | -                             | 17         |
| MoP/NPG                                  | 1.0 M KOH    | 10 mA cm <sup>-2</sup>  | 126                | 56                            | 18         |
| MoP@NC                                   | 1.0 M KOH    | 10 mA cm <sup>-2</sup>  | 149                | 55.9                          | 19         |
| Se-MoS <sub>2</sub> /CoSe <sub>2</sub>   | 1.0 M KOH    | 100 mA cm <sup>-2</sup> | 93                 | -                             | 20         |

## References

1. D. M. Morales, M. A. Kazakova, S. Dieckhöfer, A. G. Selyutin, G. V. Golubtsov, W. Schuhmann and J. Masa, *Advanced Functional Materials*, 2020, **30**, 1905992.
2. D. Chen, J. Zhu, X. Mu, R. Cheng, W. Li, S. Liu, Z. Pu, C. Lin and S. Mu, *Appl. Catal. B Environ.*, 2020, **268**, 118729.
3. J. Wang and H. C. Zeng, *ACS Applied Materials & Interfaces*, 2020, **12**, 50324-50332.
4. J. Jiang, Y.-J. Zhang, X.-J. Zhu, S. Lu, L.-L. Long and J.-J. Chen, *Nano Energy*, 2021, **81**, 105619.
5. H. Liu, J. Guan, S. Yang, Y. Yu, R. Shao, Z. Zhang, M. Dou, F. Wang and Q. Xu, *Adv. Mater.*, 2020, **32**, 2003649.
6. Q.-Q. Pang, Z.-L. Niu, S.-S. Yi, S. Zhang, Z.-Y. Liu and X.-Z. Yue, *Small*, 2020, **16**, 2003007.
7. G. Yuan, J. Bai, L. Zhang, X. Chen and L. Ren, *Appl. Catal. B Environ.*, 2021, **284**, 119693.
8. Y. Luo, H. Yang, P. Ma, S. Luo, Z. Zhao and J. Ma, *ACS Sus. Chem. Eng.*, 2020, **8**, 3336-3346.
9. L. Yang, H. Ren, Q. Liang, K. N. Dinh, R. Dangol and Q. Yan, *Small*, 2020, **16**, 1906766.
10. J. Diao, Y. Qiu, S. Liu, W. Wang, K. Chen, H. Li, W. Yuan, Y. Qu and X. Guo, *Adv. Mater.*, 2020, **32**, 1905679.
11. F.-T. Tsai, Y.-T. Deng, C.-W. Pao, J.-L. Chen, J.-F. Lee, K.-T. Lai and W.-F. Liaw, *J. Mater. Chem. A.*, 2020, **8**, 9939-9950.
12. D. Li, X. Chen, Y. Lv, G. Zhang, Y. Huang, W. Liu, Y. Li, R. Chen, C. Nuckolls and H. Ni, *Appl. Catal. B Environ.*, 2020, **269**, 118824.
13. W. Hu, Q. Shi, Z. Chen, H. Yin, H. Zhong and P. Wang, *ACS Appl. Mater. Interfaces.*, 2021, **13**, 8337-8343.
14. S. Ibraheem, X. Li, S. S. A. Shah, T. Najam, G. Yasin, R. Iqbal, S. Hussain, W. Ding and F. Shahzad, *ACS Appl. Mater. Interfaces.*, 2021, **13**, 10972-10978.
15. Q.-Q. Pan, C.-Y. Xu, X. Li, J.-F. Zhang, X.-L. Hu, Y. Geng and Z.-M. Su, *Chem. Eng. J.*, 2021, **405**, 126962.
16. A. Wu, Y. Gu, Y. Xie, H. Yan, Y. Jiao, D. Wang and C. Tian, *J. Alloys. Comp.*, 2021, **867**, 159066.



17. S. H. Park, T. H. Jo, M. H. Lee, K. Kawashima, C. B. Mullins, H.-K. Lim and D. H. Youn, *J. Mater. Chem. A.*, 2021, **9**, 4945-4951.
18. R. Ge, J. Huo, T. Liao, Y. Liu, M. Zhu, Y. Li, J. Zhang and W. Li, *Appl. Catal. B Environ.*, 2020, **260**, 118196.
19. C. Pi, C. Huang, Y. Yang, H. Song, X. Zhang, Y. Zheng, B. Gao, J. Fu, P. K. Chu and K. Huo, *Appl. Catal. B Environ.*, 2020, **263**, 118358.
20. L. Liao, J. Sun, D. Li, F. Yu, Y. Zhu, Y. Yang, J. Wang, W. Zhou, D. Tang, S. Chen and H. Zhou, *Small*, 2020, **16**, 1906629.
